# Supplementary material for: The Hantzsch reaction for nitrogen-13 PET: preparation of [13N]nifedipine and derivatives
Source: Royal Society of Chemistry journal article supplement (doi:10.1039/d1cc00495f), 2021-01-01
Supplement: d1cc00495f1.pdf [file d1cc00495f1.pdf]

1 **Electronic Supplementary Information**

2

3 **Chemical Communications**

4

5 **The Hantzsch Reaction for Nitrogen-13 PET: Preparation of [<sup>13</sup>N]Nifedipine and**  
6 **Derivatives**

7

8 **Julia E. Blower, Michelle T. Ma, Fahad A. I. Al-Saleme and Antony D. Gee**

9

10 *King's College London, School of Biomedical Engineering and Imaging Sciences, Department of Imaging*  
11 *Chemistry and Biology, 4th Floor Lambeth Wing, St Thomas' Hospital, London, SE1 7EH, United Kingdom; Fax:*  
12 *020 718 85442; Tel: 020 718 88366; Email: [julia.blower@kcl.ac.uk](mailto:julia.blower@kcl.ac.uk); [antony.gee@kcl.ac.uk](mailto:antony.gee@kcl.ac.uk)*

13

14

15

CONTENTS

16

17 SYNTHESIS AND CHARACTERISATION OF 1,4-DHP STANDARDS

18 PRECURSOR INTERMEDIATE CHARACTERISATION

19 RADIOLABELLING METHODS

20 MICROPET/CT IMAGING AND BIODISTRIBUTION

21 REFERENCES

22

23

24

25

26

27

28

29

## 30 SYNTHESIS AND CHARACTERISATION OF 1,4-DHP STANDARDS

### 31 Chemicals

32 4-(4-Cl-Ph)-2,6-dimethyl-1,4-dihydro-pyridine-3,5-dicarboxylic acid dimethyl ester, 2,6-dimethyl-4-  
33 phenyl-1,4-dihydro-pyridine-3,5-dicarboxylic acid dimethyl ester, 2,6-dimethyl-4-p-tolyl-1,4-dihydro-  
34 pyridine-3,5-dicarboxylic acid dimethyl ester, 4-chlorobenzaldehyde (97%), 4-fluorobenzaldehyde  
35 (98%), 4-formylbenzotrile (95%) and methyl 4-formylbenzoate (99%) were purchased from Aldrich.  
36 Dimethyl 2,6-dimethyl-4-(2-nitrophenyl)-1,4-dihydropyridine-3,5-dicarboxylate (nifedipine) was  
37 purchased from MP Biomedicals. P-tolualdehyde (98%) and 4-hydroxybenzaldehyde (98%) were  
38 purchased from Alfa Aesar. 2-nitrobenzaldehyde (99+%) was purchased from Acros Organics.  
39 Benzaldehyde (ReagentPlus®, 99%) was purchased from Sigma-Aldrich.

### 40 Instrumentation

41 Reactions were carried out using a CEM Discover microwave synthesis unit. Radio-HPLC analysis was  
42 performed on an Agilent Technologies 1200 Series HPLC with Lablogic  $\beta+$  detector. Radio-LCMS was  
43 performed on Agilent Technologies 6520 Accurate-Mass Q-TOF LC/MS system with Agilent  
44 Technologies 1200 Series HPLC connected in series with a UV detector (254 nm) and Lablogic  $\beta+$   
45 detector.  $^1\text{H}$  and  $^{13}\text{C}$  NMR were acquired using a Bruker DRX 400 MHz. Analytical HPLC and radio-  
46 HPLC analysis was performed using an Agilent Eclipse XDB- $\text{C}_{18}$  column (5  $\mu\text{M}$ , 4.6  $\times$  150 mm); flow  
47 rate 1 mL/min; mobile phase: Solvent A:  $\text{H}_2\text{O}$  + 0.1% TFA, solvent B: MeOH + 0.1% TFA, time:%B,  
48 0:5, 1:5, 10:95, 15:95, 18:5, 23:5. Semi-preparative radioHPLC was carried out using an Agilent Eclipse  
49 XDB- $\text{C}_{18}$  column (5  $\mu\text{m}$ , 9.4  $\times$  250 mm); flow rate 3 mL/min; mobile phase: solvent A:  $\text{H}_2\text{O}$  + 0.1%  
50 TFA; solvent B: MeOH + 0.1% TFA; time (min): %B 0:50, 5:95, 10:95, 15:5, 18:5.

### 51 Synthesis of 1,4-DHP standards

52 For 1,4-dihydropyridine standards not commercially available (dimethyl 4-(4-cyanophenyl)-2,6-  
53 dimethyl-1,4-dihydropyridine-3,5-dicarboxylate, dimethyl 4-(4-(methoxycarbonyl)phenyl)-2,6-  
54 dimethyl-1,4-dihydropyridine-3,5-dicarboxylate, and dimethyl 4-(4-fluorophenyl)-2,6-dimethyl-1,4-  
55 dihydropyridine-3,5-dicarboxylate), substituted benzaldehyde (1 mmol), methylacetoacetate (2 mmol)

56 and ammonia (28%, excess) were combined in a microwave tube in ethanol (1 mL). The mixture was  
57 heated in the microwave synthesis unit at 80 °C for 30 min. The solvent was evaporated under vacuum.  
58 The remaining solid was washed successively three times with cold methanol (10 mL × 3) and the solid  
59 collected and dried. <sup>1</sup>H NMR, <sup>13</sup>C NMR and LC-MS analysis was carried out. All compounds are  
60 previously known.<sup>1-3</sup>

61 Analytical characterisation

62 **Dimethyl 4-(4-cyanophenyl)-2,6-dimethyl-1,4-dihydropyridine-3,5-dicarboxylate (2):** yellow  
63 solid; <sup>1</sup>H NMR (400 MHz, DMSO-*d*<sub>6</sub>): δ 9.02 (s, 1H, NH), 7.69 (d, *J*=8.3 Hz, 2H, 2CH<sub>Ar</sub>), 7.31 (d,  
64 *J*=8.3 Hz, 2H, 2CH<sub>Ar</sub>), 4.93 (s, 1H, CH), 3.34 (s, 6H, 2CH<sub>3</sub>), 2.27 (s, 6H, 2CH<sub>3</sub>); <sup>13</sup>C NMR (400 MHz,  
65 DMSO-*d*<sub>6</sub>): δ 166.99, 153.03, 146.50, 132.16, 128.04, 118.94, 108.82, 100.58, 50.78, 18.19; LCMS  
66 (ESI) [M+H]<sup>+</sup> calcd for C<sub>18</sub>H<sub>18</sub>N<sub>2</sub>O<sub>4</sub>: 327.13, found: 327.13.

67 **Dimethyl 4-(4-(methoxycarbonyl)phenyl)-2,6-dimethyl-1,4-dihydropyridine-3,5-dicarboxylate**  
68 **(4):** pale yellow solid; <sup>1</sup>H NMR (400 MHz, DMSO-*d*<sub>6</sub>): δ 8.97 (s, 1H, NH), 7.82 (d, *J*=8.2 Hz, 2H,  
69 2CH<sub>Ar</sub>), 7.27 (d, *J*=8.3 Hz), 2H, 2CH<sub>Ar</sub>), 4.94 (s, 1H, CH), 3.80 (s, 3H, CH<sub>3</sub>), 3.53 (s, 6H, 2CH<sub>3</sub>), 2.26  
70 (s, 6H, 2CH<sub>3</sub>); <sup>13</sup>C NMR (400 MHz, DMSO-*d*<sub>6</sub>): δ 167.11, 166.11, 153.02, 146.17, 129.12, 127.37,  
71 100.87, 51.93, 50.70, 18.19; LCMS (ESI) [M+H]<sup>+</sup> calcd for C<sub>19</sub>H<sub>21</sub>NO<sub>6</sub>: 360.14, found: 360.15.

72 **Dimethyl 4-(4-fluorophenyl)-2,6-dimethyl-1,4-dihydropyridine-3,5-dicarboxylate (5):** white solid;  
73 <sup>1</sup>H NMR (400 MHz, CDCl<sub>3</sub>): δ 7.24 (d, *J*=8.2 Hz, 2H, 2CH<sub>Ar</sub>), 6.80 (d, *J*= 8.2 Hz, 2H, 2CH<sub>Ar</sub>), 5.72  
74 (bs, 1H, NH), 4.86 (s, 1H, CH), 3.44 (s, 6H, 2CH<sub>3</sub>), 2.31 (s, 6H, 2CH<sub>3</sub>); <sup>13</sup>C NMR (400 MHz, CDCl<sub>3</sub>):  
75 δ 168.01, 145.08, 144.42, 129.11, 128.94, 126.38, 103.99, 51.56, 38.44, 19.67; LCMS (ESI) [M+H]<sup>+</sup>  
76 calcd for C<sub>17</sub>H<sub>18</sub>NO<sub>4</sub>F: 320.13, found: 320.13

77

78

79

80

81 PRECURSOR INTERMEDIATE CHARACTERISATION

82 LC-HRMS analysis of precursor reaction mixture for nifedipine, containing 2-nitrobenzaldehyde (5  
83 mmol) and methylacetoacetate (10 mmol) in DMF was carried out. Data indicated the presence of  
84 possible *E* and *Z* isomers of methyl-2-(2-nitrobenzylidene)-3-oxobutanoate (Figure 1, peak 1 and 2) and  
85 dimethyl 2,4-diacetyl-3-(2-nitrophenyl)pentanedioate intermediates (Figure 1, peak 3):

86 LCMS (ESI)  $[M+H]^+$  calcd for  $C_{12}H_{11}NO_5$ : 250.0715, found: 250.0725;  $[M+Na]^+$  calcd for  $C_{12}H_{11}NO_5$ :  
87 272.0534, found: 272.0543.

88  $[M+H]^+$  calcd for  $C_{17}H_{19}NO_8$ : 366.1188, found: 366.1188;  $[M+Na]^+$  calcd for  $C_{17}H_{19}NO_8$ : 388.1008,  
89 found: 388.1009.

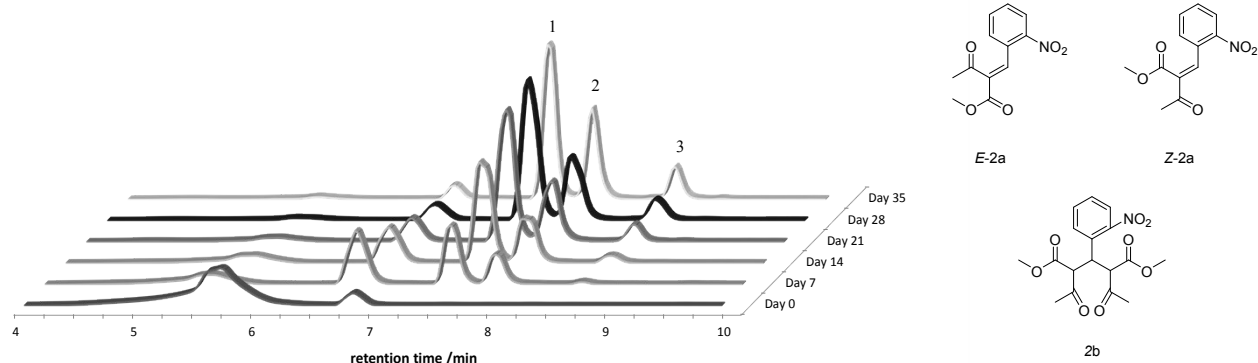

90  
91 **Figure 1.** UV chromatograms of the nifedipine precursor mixture sampled over a 35-day time period.  
92 Peaks 1 and 2: isomers of  $M = 249.0637$  (*E*-2a and/or *Z*-2a); peak 3:  $M = 365.1110$  (2b)

93

94 For isolation of intermediates, semi-preparative HPLC was performed on an Agilent Technologies  
95 1200 Series HPLC with GinaStar acquisition software using an Agilent Eclipse XDB-C<sub>18</sub> column (5  
96  $\mu\text{m}$ ,  $9.4 \times 250$  mm); flow rate 3 mL/min; mobile phase: solvent A:  $\text{H}_2\text{O} + 0.1\%$  TFA; solvent B: MeOH  
97 + 0.1% TFA; time (min): %B 0:5, 60:60, 70:60, 90:100, 100:100, 120:5. Fractions were collected  
98 manually and analysed by atmospheric pressure chemical ionisation mass spectrometry (APCI-MS) to  
99 confirm fraction identity, followed by lipholisation overnight. Samples were analysed on HPLC to  
100 assess purity. Any impure samples were re-purified again with semi-preparative HPLC using a slower  
101 gradient: time (min): %B 0:5, 5:30, 30:60, 35:60, 45:5, 120:5. Fractions were collected manually and

102 analysed by APCI-MS to confirm fraction identity, followed by lipholisation overnight. Samples were  
103 submitted for  $^1\text{H}$  and  $^{13}\text{C}$  NMR analysis. The identity of intermediate species *E*-2a and *Z*-2a was  
104 confirmed by  $^1\text{H}$  and  $^{13}\text{C}$  NMR. Although fractions containing 2b were also isolated, as evidenced by  
105 mass spectral analysis, NMR analysis showed that this intermediate decomposed in solution.

106

107  $^1\text{H}$  and  $^{13}\text{C}$  analysis

108 **methyl-(*Z*)-2-(2-nitrobenzylidene)-3-oxobutanoate (*Z*-2a):**  $^1\text{H}$  NMR (400 MHz,  $\text{CD}_3\text{CN}$ ):  $\delta$  8.23 (dd,  
109  $J = 8.2, 1.1$  Hz, 1H,  $\text{CH}_{\text{Ar}}$ ), 8.07 (s, 1H, CH), 7.78 (td,  $J = 7.5, 1.1$  Hz, 1H,  $\text{CH}_{\text{Ar}}$ ), 7.68 (td,  $J = 8.2, 1.6$   
110 Hz, 1H,  $\text{CH}_{\text{Ar}}$ ), 7.47(d,  $J = 7.7$  Hz, 1H,  $\text{CH}_{\text{Ar}}$ ), 3.60 (s, 3H,  $\text{CH}_3$ ), 2.46 (s, 3H,  $\text{CH}_3$ );  $^{13}\text{C}$  NMR (400  
111 MHz,  $\text{CD}_3\text{CN}$ ):  $\delta$  195.72, 166.93, 147.86, 141.20, 136.96, 134.90, 131.19, 130.82, 130.40, 125.60,  
112 52.43, 26.79

113 **methyl-(*E*)-2-(2-nitrobenzylidene)-3-oxobutanoate (*E*-2a):**  $^1\text{H}$  NMR (400 MHz,  $\text{CD}_3\text{CN}$ ):  $\delta$  8.22  
114 (dd,  $J = 8.2, 1.2$  Hz, 1H,  $\text{CH}_{\text{Ar}}$ ), 8.04 (s, 1H, CH), 7.74 (td,  $J = 7.5, 0.9$  Hz, 1H,  $\text{CH}_{\text{Ar}}$ ), 7.65 (td,  $J = 7.9,$   
115  $1.7$  Hz, 1H,  $\text{CH}_{\text{Ar}}$ ), 7.38 (d,  $J = 7.6$  Hz, 1H,  $\text{CH}_{\text{Ar}}$ ), 3.87 (s, 3H,  $\text{CH}_3$ ), 2.24 (s, 3H,  $\text{CH}_3$ );  $^{13}\text{C}$  NMR (400  
116 MHz,  $\text{CD}_3\text{CN}$ ):  $\delta$  201.12, 165.00, 147.96, 140.52, 136.41, 134.76, 131.20, 130.99, 130.74, 125.57,  
117 52.90, 31.05

118 Based on  $^1\text{H}$  NMR integration, *E*-2a contains a small amount of impurities, <10%.

119 Stereoisomers *Z*-2a and *E*-2a were distinguished via 2D  $^1\text{H}$ - $^1\text{H}$  NOESY NMR: for *Z*-2a a cross-peak  
120 was observed between the ketone methyl group ( $\delta$  2.46) and the alkene proton ( $\delta$  8.07) (Figure 2).

121

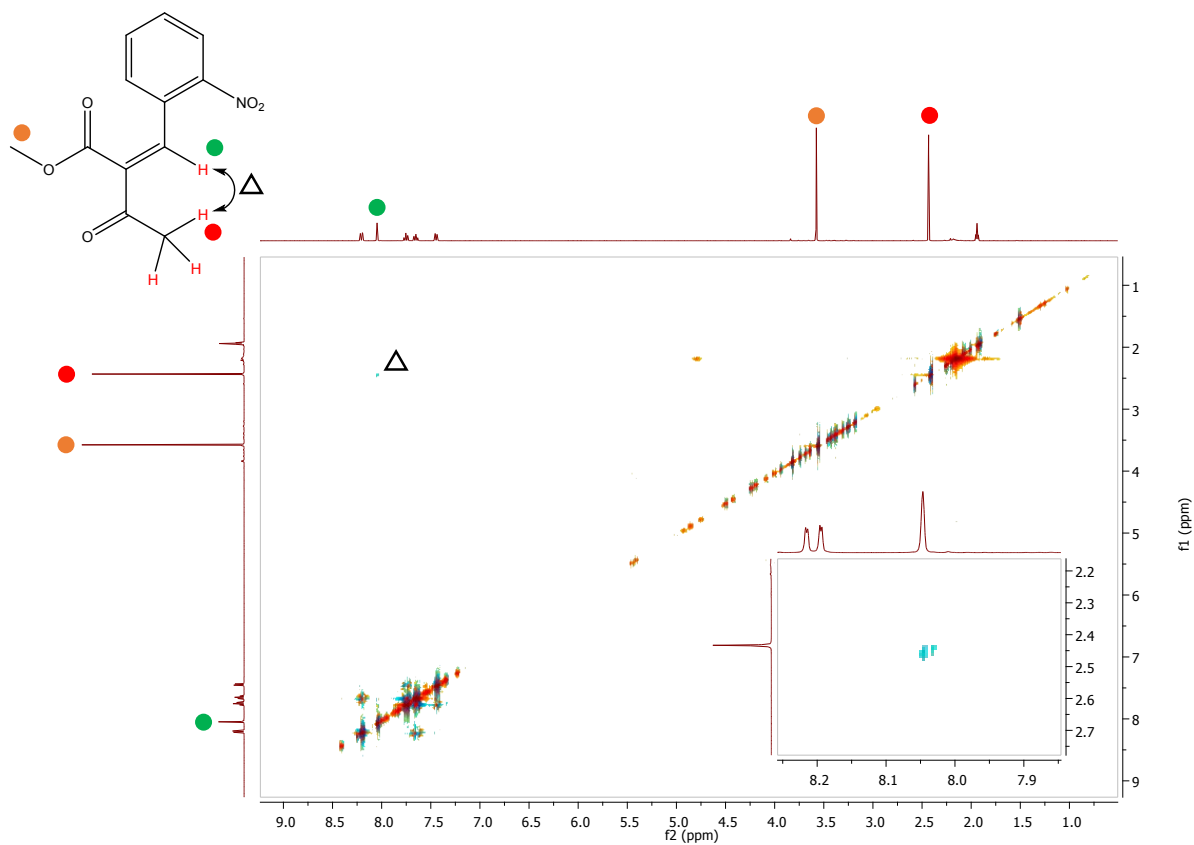

122

123 **Figure 2.** 2D <sup>1</sup>H-<sup>1</sup>H NOESY NMR for methyl-(*Z*)-2-(2-nitrobenzylidene)-3-oxobutanoate (**Z-2a**). Inset  
 124 shows zoom of cross-peak at  $\delta$  8.07 (alkene proton) and  $\delta$  2.46 (ketone methyl group), denoted by  $\Delta$

## 125 RADIOLABELLING METHODS

### 126 Production of aqueous [<sup>13</sup>N]NH<sub>3</sub>

127 Aqueous [<sup>13</sup>N]NH<sub>3</sub> was produced on a CTI RDS 112 biomedical cyclotron via the <sup>16</sup>O(p,α)<sup>13</sup>N nuclear  
128 reaction.<sup>4</sup> The target contained 8 mL H<sub>2</sub>O with 5 mM ethanol and was irradiated with 11.2 MeV protons  
129 at a beam current of 30 μA for 20 min. The irradiated solution was pumped from the cyclotron through  
130 narrow bore PEEK tubing to the radiochemistry laboratory where it was passed through an IC-OH  
131 cartridge (Maxi-Clean™, Grace Davison Discovery Sciences) conditioned with water (5 mL), to  
132 remove impurities. The molar activity of [<sup>13</sup>N]NH<sub>3</sub> was calculated to be 2.64 ± 0.12 GBq μmol<sup>-1</sup>.

### 133 Radiolabelling optimisation

134 Aqueous [<sup>13</sup>N]NH<sub>3</sub> (8 mL) from the cyclotron was concentrated into a smaller volume (1 mL) by loading  
135 on to a weak cation exchange Sep-Pak (Accell Plus CM Light 130 mg, Waters), rinsing with water (5  
136 mL), and eluting with saline (0.9%, 1 mL). A stock precursor mixture was prepared: substituted  
137 benzaldehyde derivative (5 mmol) and methylacetoacetate (10 mmol) were combined in DMF (10 mL).  
138 From this stock solution, a 200 μL aliquot containing benzaldehyde derivative (0.1 mmol) and methyl  
139 acetoacetate (0.2 mmol) was used for each radiosynthesis. The aliquot was combined with an aqueous  
140 solution of NaOH (1 M, 5 μL) and [<sup>13</sup>N]NH<sub>3</sub> (100 μL, 150 MBq). The mixture was heated in a  
141 microwave synthesiser at different temperatures and reaction time. A sample of the crude reaction  
142 mixture (20 μL) was analysed via radio-HPLC. Radiochemical yields are detailed in the main  
143 manuscript (Table 1, main manuscript).

### 144 High radioactivity preparation of <sup>13</sup>N-labelled 1,4-DHPs

145 Aqueous [<sup>13</sup>N]NH<sub>3</sub> (1.5 GBq) was trapped on a cation exchange Accell Plus CM Light Sep-Pak  
146 cartridge (130 mg, conditioned with water followed by air). The [<sup>13</sup>N]NH<sub>3</sub> was eluted with sodium  
147 chloride solution (250 μL, 1 M) into a microwave vial containing precursor mixture consisting of methyl  
148 acetoacetate (0.2 mmol) and benzaldehyde derivative (0.1 mmol) in DMF (200 μL), and aqueous NaOH  
149 (1 M, 5 μL). The mixture was heated in the microwave at 100 °C for 5 min. The mixture was then  
150 cooled and diluted with methanol (500 μL), before HPLC purification. The radioactive [<sup>13</sup>N]1,4-DHP

151 fraction eluted at ~ 8 min and was collected in approximately 3 mL of HPLC mobile phase containing  
152 MeOH, water and TFA. The radioactive [<sup>13</sup>N]1,4-DHP HPLC fraction was diluted with water (3 mL)  
153 and loaded on to a C<sub>18</sub> Plus Light Sep-Pak (130 mg, conditioned with methanol, then water, and dried  
154 with air). The final product was eluted from the cartridge with ethanol (300 μL), and saline (2.7 mL,  
155 0.9%) was slowly added to the solution for final reconstitution. A sample of the final tracer solution  
156 was analysed using radio-HPLC (Figure 3). The molar activity of the final product was calculated for  
157 [<sup>13</sup>N]nifedipine using HPLC: the area under the curve of the UV signal of known concentrations of non-  
158 radioactive nifedipine standard was used to derive a standard curve. This was used to calculate the  
159 unknown concentration of nifedipine in the radioactive [<sup>13</sup>N]nifedipine sample by integrating the area  
160 under the curve of the signal in the UV.



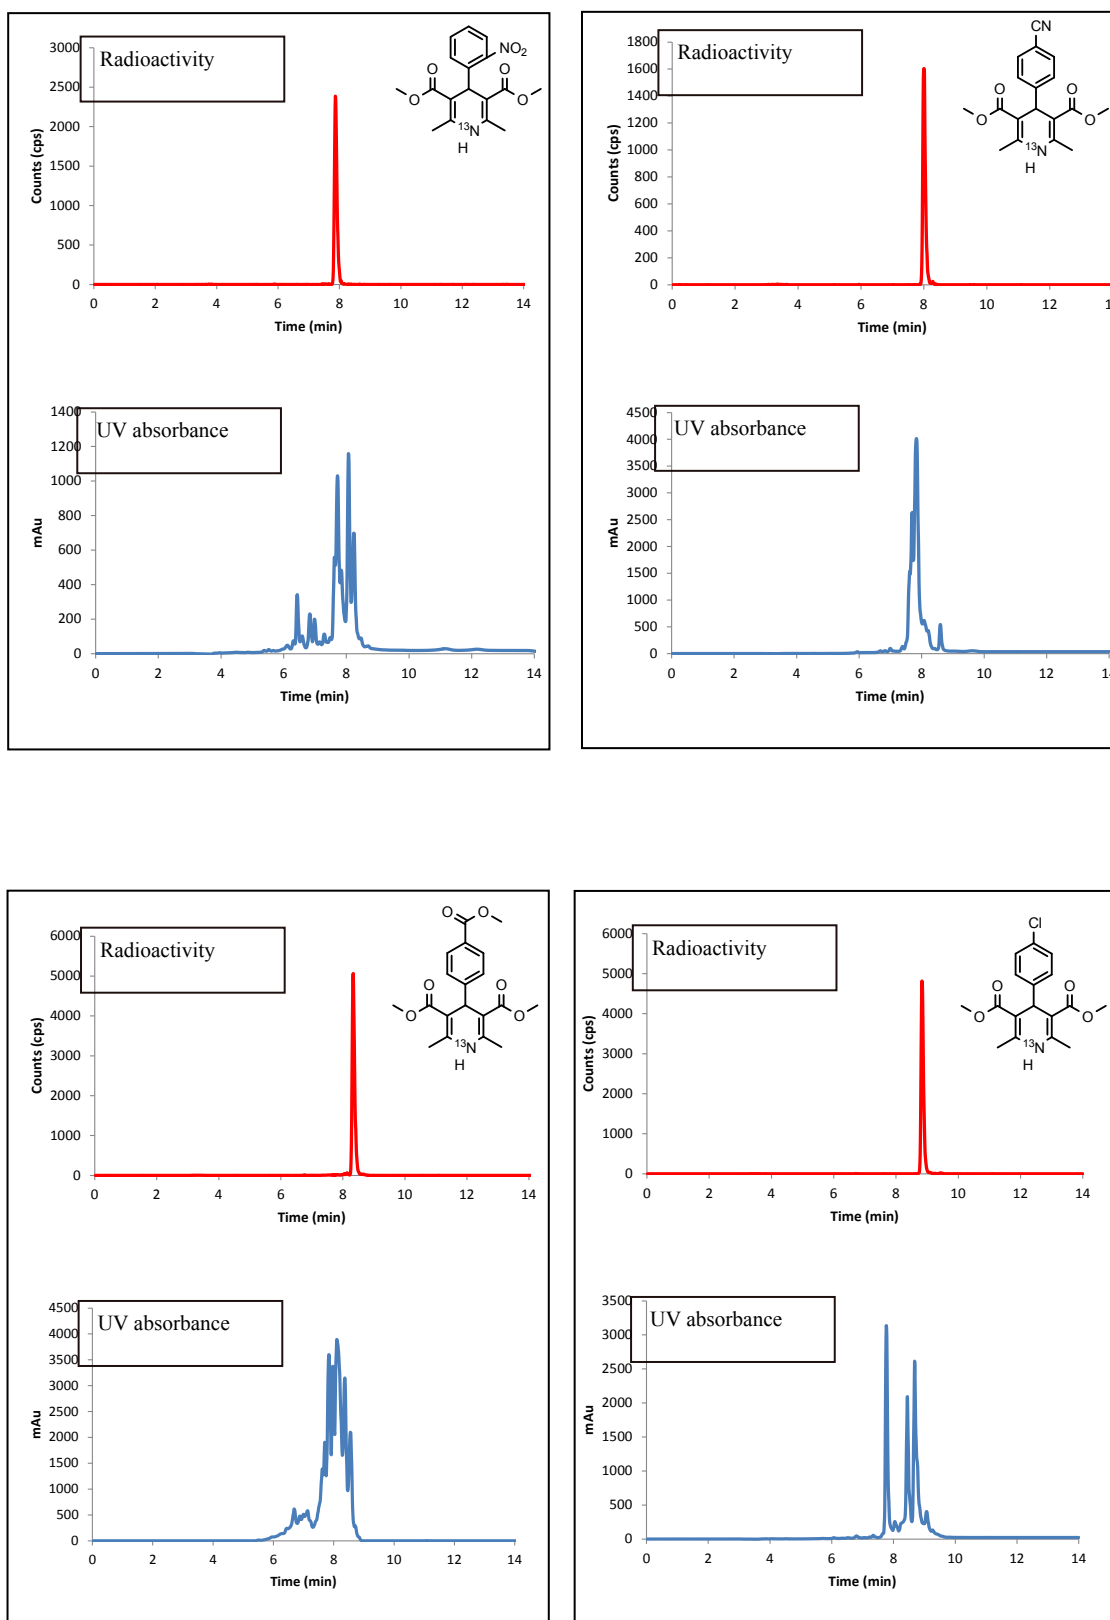

**Figure 3.** HPLC radio-chromatogram of the <sup>13</sup>N-labelled 1,4-DHPs, after semi-preparative purification. Red: radioactivity (counts per second); blue: UV absorption (254 nm). Whilst the radiochromatograms show high radiochemical purity for each <sup>13</sup>N-labelled derivative (> 99 %), UV traces for all radiolabelled compounds show the presence of multiple non-radioactive species.

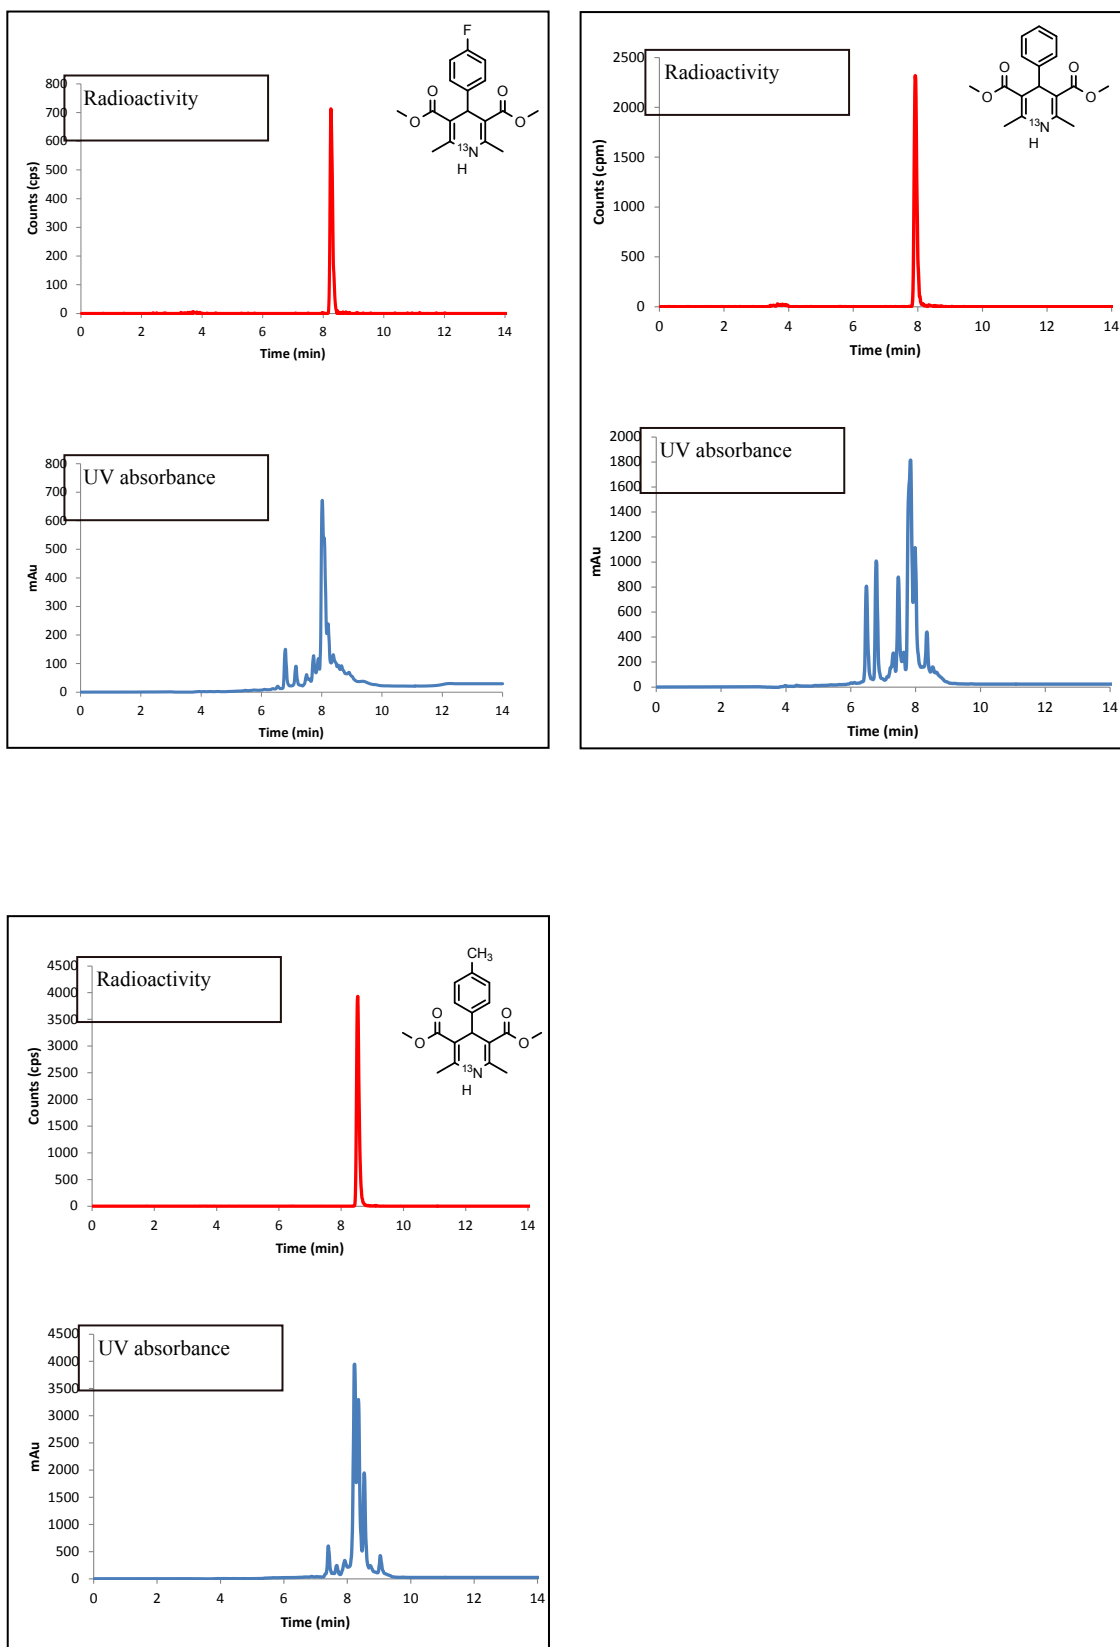

**Figure 3 (cont.).** HPLC radio-chromatogram of the  $^{13}\text{N}$ -labelled 1,4-DHPs, after semi-preparative purification. Red: radioactivity (counts per second); blue: UV absorption (254 nm). Whilst the radiochromatograms show high radiochemical purity for each  $^{13}\text{N}$ -labelled derivative (> 99 %), UV traces for all radiolabelled compounds show the presence of multiple non-radioactive species.

## MICROPET/CT IMAGING AND BIODISTRIBUTION

All animal experiments in this study were performed under Home Office licence number PPL70/7019; this licence was approved by KCL AWERB (Animal Welfare and Ethical Review Board) prior to submission and granting of authorisation by the UK government Home Office. All experimental designs were in line and performed in accordance with the Animals (Scientific Procedures) Act, 1986, 2012 amendment.

PET imaging and biodistribution of [<sup>13</sup>N]nifedipine was performed on female Wistar rats. Rats were kept in standard local animal housing conditions housing conditions and fed *ad libitum* with regular animal feed.

### MicroPET/CT Imaging

Imaging experiments were performed using a nanoScan® PET/CT (123 mm transaxial FOV, 0.98 mm spatial resolution) (Mediso Medical Imaging Systems, Budapest, Hungary). A rat was anaesthetised under 1 L/min O<sub>2</sub> flow rate with 3% isoflurane (Vet Tech Solution Ltd.). [<sup>13</sup>N]Nifedipine (~4 MBq, 46 µmol in 800 µL 0.9% saline, 10% EtOH) was injected via tail vein using a catheter while the animal was on the scan bed. Isoflurane inhalation (1.5-3%) was achieved using a facemask for the duration of the scan (Equipment veterinaire Minerve). Dynamic upper-body PET imaging (energy window 400-600 keV; coincidence relation 1:3) was acquired for 1 h post-administration of the tracer, followed by a 5-7 min CT scan (180 projections, pitch 1). Respiration rate was monitored for the duration of the imaging process. At the end of the imaging experiment, the rat was culled using terminal anaesthesia (1 L/min O<sub>2</sub> flow with 5% isoflurane) followed by cervical dislocation. All PET/CT images acquired were processed and analysed using Vivoquant 1.21 (Invicro Imaging Services and Software), which enables the overlay of PET and CT images. For quantification of PET signal, regions of interest (ROI's) were drawn manually within the heart, right common carotid artery (blood), liver and brain. A single ROI that is 4-pixels in size was drawn for each organ. The heart ROI was drawn close to the periphery of the ventricle in an attempt to capture signal within heart muscle, avoiding blood pool signal from the ventricular cavity.

### Ex vivo biodistribution

A rat was anaesthetised under 1 L/min O<sub>2</sub> flow rate with 3 % isoflurane. [<sup>13</sup>N]Nifedipine (~ 4.5 MBq in 600 µL of 0.9 % saline, 10% EtOH) was administered via tail vein. Anaesthesia was maintained by isoflurane inhalation (1.5-3 %) using a face mask for the duration of the experiment. At 25 min post-injection, the rat was culled using terminal anaesthesia (1 L/min O<sub>2</sub> flow with 5% isoflurane) followed by cervical dislocation. Tissues of interest were extracted and washed in PBS buffer to remove residual blood. The tissue was transferred to weighed tubes for weighing and measurement in the gamma counter (LKB Wallac 1282 Compugamma Universal). The injected dose was calculated by measuring the weight of the syringe before and after injection. Accumulation of radioactivity in each organ was expressed as percentage of injected dose (% ID, Figure 4) and percentage of injected dose per gram (% ID/g, Figure 5).

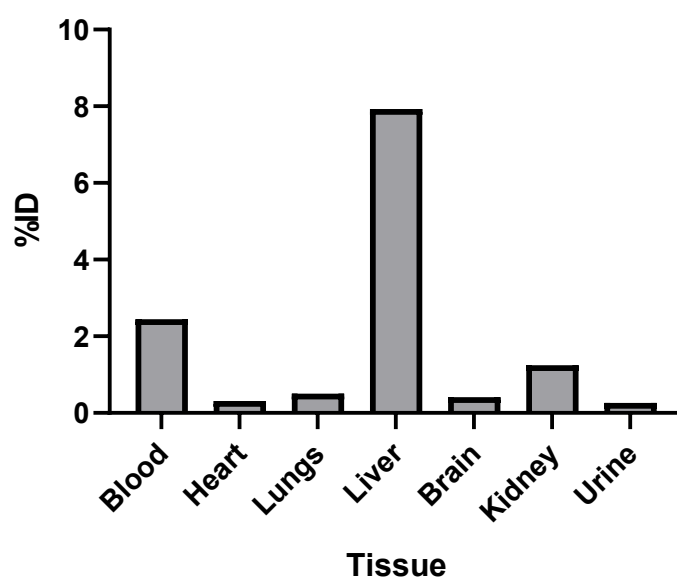

**Figure 4.** %ID of [<sup>13</sup>N]nifedipine in normal rat at 30 min post-injection (n=1)

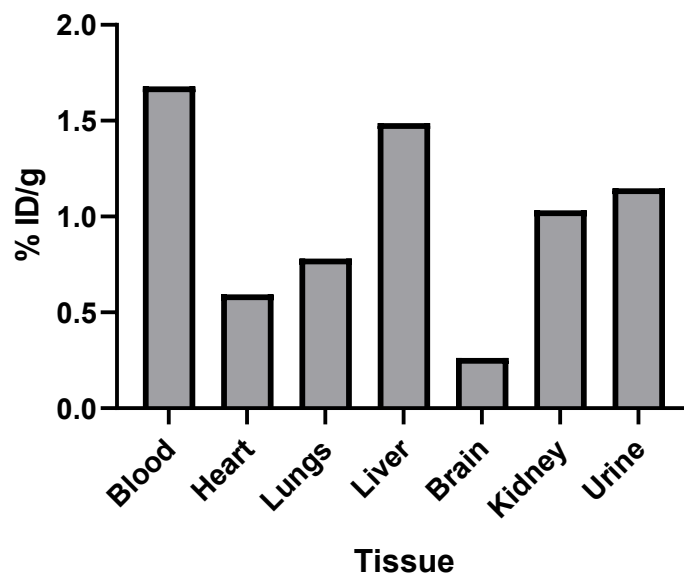

**Figure 5.** %ID/g of [<sup>13</sup>N]nifedipine in normal rat at 30 min post-injection (n=1)

#### REFERENCES

1. M. F. Gordeev, D. V. Patel and E. M. Gordon, *J Org Chem*, 1996, **61**, 924-928
2. J. Legeay, J. J. V. Eynde and J. P. Bazureau, *Tetrahedron*, 2005, **61**, 12386-12397
3. A. G. Sathicq, G. P. Romanelli, A. Ponzinibbio, G. T. Baronetti and H. J. Thomas, *Lett Org Chem*, 2010, **7**, 511-518
4. B. Wieland, G. Bida, H. Padgett, G. Hendry, E. Zippi, G. Kabalka, J. L. Morelle, R. Verbruggen and M. Ghyoot, *Int J Rad Appl Instrum A*, 1991, **42**, 1095-1098.

#### ACKNOWLEDGEMENTS

The authors wish to acknowledge the expertise of Matthew Farleigh in preparation of Figure 2.
